# Supplementary material
Source: publisher figshare collection journal article supplement (https://brill.figshare.com/articles/dataset/_/14919648)
Supplement: Supplementary file 1 [file 1]

## Short Note

# Sexual size dimorphism and life history traits in an island-mainland system: an overview of the lizard genus *Microlophus*

Ken S. Toyama<sup>1,\*,\*\*</sup>, Christopher K. Boccia<sup>2,\*\*\*</sup>

1 - Department of Ecology and Evolutionary Biology, University of Toronto, Toronto, ON, M4Y 1R5, Canada

2 - Department of Biology, Queen's University, Kingston, ON, K7L 3N6, Canada

\*Corresponding author; e-mail: ken.toyama@mail.utoronto.ca

\*\*ORCID: 0000-0002-8331-4894

\*\*\*ORCID: 0000-0003-3981-4944

## Supplementary material

### About Table S1

Table S1 shows all the individual records considered in this study. Each row represents a single record for male/female body size, clutch size or size at maturity corresponding to a particular population or sample. One reference can contain information for multiple populations or samples, and information for each population or sample can include more than one characteristic (e.g., one

reference could report just body size for three populations, while another could report body size and clutch size for a single population). Columns represent the following type of data:

species: *Microlophus* species of the record.

source: reference the record is obtained from (can be found in the references section below).

Island\_Mainland: Whether the species is insular or continental.

svl\_max\_M: maximum male SVL (in mm). The maximum size of an unsexed group of individuals will be considered as a maximum SVL record for males.

svl\_avg\_M: mean male SVL (in mm).

sd\_M: standard deviation of the mean male SVL.

svl\_max\_F: maximum female SVL (in mm).

svl\_avg\_F: mean female SVL (in mm).

sd\_F: standard deviation of the mean female SVL.

N\_males: male sample size of the record.

N\_females: female sample size of the record.

N\_total: total sample size. Should be equal to N\_males + N\_females, except cases where unsexed juveniles are treated as a separate category or no sex information is detailed.

clutch\_size: mean number of oviductal or laid eggs.

clutch\_size\_N: sample size for mean clutch size.

size\_maturity\_F: female size at maturity (in mm).

size\_maturity\_F\_N: sample size for female size at maturity.

data\_type: types include “field” (measurements come from individuals captured in the field), “museum” (measurements from museum specimens), “museum\_and\_field” (record includes field

and museum data), “compilation” (data obtained from a previous compilation) and “undefined” (data type is not specified).

An “x” for a particular item indicates that no data is available in that record.

### **Museum specimens**

Museum of Comparative Zoology (MCZ, Harvard University) and Laboratorio de Estudios en Biodiversidad (LEB, Universidad Peruana Cayetano Heredia) specimen IDs for specimens used in this study (some IDs correspond to multiple specimens and a few specimens had no ID):

*M. albemarlensis*: MCZ: 2534, 5421, 9415, 9416, 9417, 9418, 9419, 9420, 22663, 28471, 28472, 28473, 28474, 28480, 28481, 28482, 28483, 28484, 36923, 36924, 36925, 54721

*M. atacamensis*: MCZ: 164338, 164339, 165457, 165458, 165459, 165460, 165461, 165462

*M. bivittatus*: MCZ: 9206, 9207, 9208, 9209, 9425, 9426, 9428

*M. delanonis*: MCZ: 9407, 9408, 9409, 28489, 28491, 28492, 36901, 36904, 36905, 36907, 36908, 83067, 83216, 83217

*M. duncanensis*: MCZ: 9210, 9211, 9404, 9405

*M. grayii*: MCZ: 28493, 52214, 52215

*M. habelii*: MCZ: 9216, 9217, 9218, 9412, 9413, 9414

*M. koepckeorum*: MCZ: 121976

*M. occipitalis*: MCZ: 10777, 10778, 10779, 18745, 79204, 79205, 79206, 79211, 79215, 79216, 83080, 83084, 83090, 83104, 83105, 83106, 83108, 83109, 100431, 123191, 147182, 156851, 160794, 160795, 160796

*M. pacificus*: MCZ: 20445, 20446, 28494, 28496

*M. peruvianus*: MCZ: 3439, 7274, 7275, 26663, 26664, 26665, 43796, 43798, 43799, 45823, 45831, 126738, 145333, 145334, 145349, 146925. LEB: LB20, LB19, LB17, LB16, LB15, LB11, LB10, LB09, LB08, LB07, LB04, LB03, LB02, LB01, JPZ153, JPZ152, JPZ151, JPZ150, JPZ149, JPZ148, JPZ147, EQ172, EQ171, EQ170, EQ169, EQ168, EQ167, EQ166, EQ165, EQ164, EQ163, EQ162, EQ160, EQ159, EQ158, EQ157, EQ112, EQ111, EQ110, EQ109, EQ108, EQ107, EQ102, EQ101, EQ100, EQ099, EQ098, EQ087

*M. stolzmanni*: MCZ: 18733, 18734, 18735, 18736, 18739, 18740, 18741, 18742, 18744, 18760, 18761, 18762, 18764, 18765, 143488

*M. theresiae*: MCZ: 12223, 12224, 122222, 151765

*M. theresioides*: MCZ: 188736, 188737, 188738, 188739, 188740, 188741

*M. thoracicus*: MCZ: 121975, 151723, 151766

*M. tigris*: MCZ: 3576, 45715, 45899, 45900, 151767

## References from Table S1

Arguedas, R., Steinberg, D., Lewbart, G. A., Deresienski, D., Lohmann, K. J., Muñoz-Pérez, J. P., & Valle, C. A. (2018). Haematology and biochemistry of the San Cristóbal Lava Lizard (*Microlophus bivittatus*). *Conservation physiology*, 6(1), coy046.

- Beuttner, A., & Koch, C. (2019). Analysis of diet composition and morphological characters of the Peruvian lizard *Microlophus stolzmanni* (Squamata: Tropiduridae). *Phyllomedusa: Journal of Herpetology*, 18(1), 47-62.
- Bonacic, C., Riquelme-Valeria, P., Leichtle, J., & Sallaberry-Pincheira, N. (2016). Guía de campo: Anfibios y Reptiles de la Región de Tarapacá. *Serie Fauna Australis, Facultad de Agronomía e Ingeniería Forestal, Pontificia Universidad Católica de Chile*.
- Carpenter, C. C. (1966). Comparative behavior of the Galápagos lava lizards (*Tropidurus*). *The Galápagos: Proceedings of the Galápagos International Scientific Project (RI Bowman, ed.)*. University of California Press, USA, 269-273.
- Carpenter, C. C. (1970). Miscellaneous Notes on Galapagos Lava Lizards (*Tropidurus*: Iguanidae). *Herpetologica*, 377-386.
- Chester, S. (2010). *A Wildlife Guide to Chile: Continental Chile, Chilean Antarctica, Easter Island, Juan Fernandez Archipelago*. Princeton University Press.
- Clark, D. L., Macedonia, J. M., Rowe, J. W., Stuart, M. A., Kemp, D. J., & Ord, T. J. (2015). Evolution of displays in Galapagos lava lizards: comparative analyses of signallers and robot playbacks to receivers. *Animal Behaviour*, 109, 33-44.
- Clark, D. L., Macedonia, J. M., Rowe, J. W., Kamp, K., & Valle, C. A. (2017). Responses of Galápagos lava lizards (*Microlophus bivittatus*) to manipulation of female nuptial coloration on lizard robots. *Herpetologica*, 73(4), 323-330.
- Dixon, J.R., Wright, J.W., 1975. A review of the lizards of the iguanid genus *Tropidurus* in Peru. *Contr. Sci. Mus. Nat. His. Los Angeles Co.* 271, 1–39.
- Escobar Huerta, G. A. (2015). Análisis multivariado de la morfometría y escutelación del género *Microlophus* Duméril & Bibron, 1837 en Chile implicaciones taxonómicas (Doctoral

dissertation, Universidad de Concepción Facultad de Ciencias Naturales y Oceanográficas.

Departamento de Zoología).

Goldberg, S. R. (2008). Reproduction in seven species of *Microlophus* (Squamata: Tropiduridae) from South America. *Texas Journal of Science*, 60(4), 261-270.

Goldberg, S. R., & Rodriguez, E. (1986). Reproductive cycles of two iguanid lizards from northern Chile, *Tropidurus quadrivittatus* and *Tropidurus theresioides*. *Journal of arid environments*, 10(2), 147-151.

Guzman Caldas, A. L. (2016). Repartición de recursos entre *Stenocercus puyango* (Torres-Carvajal, 2005) y *Microlophus occipitalis* (Peters, 1871)(Sauria: Tropiduridae) en el Parque Nacional Cerros de Amotape, Tumbes, Perú.

Hervías-Parejo, S., Heleno, R., Rumeu, B., Guzmán, B., Vargas, P., Olesen, J. M., ... & Nogales, M. (2019). Small size does not restrain frugivory and seed dispersal across the evolutionary radiation of Galápagos lava lizards. *Current zoology*, 65(4), 353-361.

Jordan, M. A., & Snell, H. L. (2002). Life history trade-offs and phenotypic plasticity in the reproduction of Galapagos lava lizards (*Microlophus delanonis*). *Oecologia*, 130(1), 44-52.

Jordan, M. A., Snell, H. L., Snell, H. M., & Jordan, W. C. (2005). Phenotypic divergence despite high levels of gene flow in Galápagos lava lizards (*Microlophus albemarlensis*). *Molecular Ecology*, 14(3), 859-867.

Meiri, S. 2008. Evolution and ecology of lizard body sizes. *Global Ecology and Biogeography* 17: 724-734.

Meiri, S., Avila, L., Bauer, A. M., Chapple, D. G., Das, I., Doan, T. M., ... & Morando, M. (2020). The global diversity and distribution of lizard clutch sizes. *Global Ecology and Biogeography*, 29(9), 1515-1530.

- Moore, J.A., Rowe, J.W., Wessels, D., Plivelich, M.T. & Valle, C.A. 2017. *Microlophus bivittatus* (San Cristóbal Lava Lizard) Diet. *Herpetological Review* 48 (4): 851
- Ortiz, J. C. 1980b. Estudios comparativos de algunas poblaciones de *Tropidurus* de la costa chilena. *Anales del Museo Nacional de Historia Natural* 13:267–278
- Péfaur, J. E., & López-Tejeda, E. (1983). Ecological notes on the lizard *Tropidurus peruvianus* in southern Peru. *Journal of Arid Environments*, 6(2), 155-160.
- Pérez, J., & Balta, K. (2005). *Microlophus quadrivittatus*. Cannibalism. *Herpetological review*, 36(2), 180.
- Ramírez Peralta, C. A. (2017). Ciclo reproductivo de *Microlophus peruvianus* (Lesson, 1826)(Sauria, Tropiduridae) de la costa de Huaura, Lima (Perú).
- Rowe, J. W., Martin, C. E., Clark, D. L., Valle, C., & Vintimilla Palacios, C. P. (2019). Habitat use and spatial ecology of three *Microlophus* lizard species from Santa Cruz and San Cristóbal Islands, Galápagos, and the coastal dry forest of Machalilla, Ecuador. *Herpetol Rev*, 50, 43-51.
- Rowe, J. W., Clark, D. L., Martin, C. E., & Valle, C. (2020). Diel and seasonal variations in the thermal biology of San Cristobal Lava Lizards (*Microlophus bivittatus*). *Journal of Thermal Biology*, 88, 102518.
- Ruiz, J., Junes, K., & Pérez, J. (2017). Ámbito de Hogar de la lagartija de las lomas *Microlophus tigris* (Sauria: Tropiduridae) en las Lomas de Carabayllo, Lima-Perú. *Revista peruana de biología*, 24(4), 357-362.
- Stebbins, R. C., Lowenstein, J. M., & Cohen, N. W. (1967). A field study of the lava lizard (*Tropidurus albemarlensis*) in the Galapagos Islands. *Ecology*, 48(5), 839-851.
- Torres-Carvajal, O. (2004). The abdominal skeleton of tropidurid lizards (Squamata: Tropiduridae). *Herpetologica*, 60(1), 75-83.

- Toyama, K. S. (2017). Interaction between morphology and habitat use: A large-scale approach in Tropidurinae lizards. *Breviora*, 554(1), 1-20.
- Toyama, K. S., Junes, K., Ruiz, J., Mendoza, A., & Pérez, J. M. (2018). Ontogenetic changes in the diet and head morphology of an omnivorous tropidurid lizard (*Microlophus thoracicus*). *Zoology*, 129, 45-53.
- Toyama, K. S., Florián, J. C., Ruiz, E. J., Gonzáles, W. L., & Gianoli, E. (2019). Sand-swimming behaviour reduces ectoparasitism in an iguanian lizard. *The Science of Nature*, 106(9-10), 53.
- Van Denburgh, J., & Slevin, J. R. (1913). The Galapagoan Lizards of the Genus *Tropidurus*: With Notes on the Iguanas of the Genera *Conolophus* and *Amblyrhynchus*. California Academy of Sciences.
- Vidal, M., Ortiz, J.C. & Labra, A. (2002): Sexual and age differences in ecological variables of the lizard *Microlophus atacamensis* (Tropiduridae) from northern Chile. *Revista Chilena de Historia Natural*, 75: 283–292.
- Vidal, M., Ortiz, J. C., Escobar, G., & Torres-Pérez, F. (2017). Identidad taxonómica de *Microlophus heterolepis* (Wiegmann, 1835) y *Microlophus yanezi* (Ortiz, 1980): Dos buenas especies del desierto interior de Chile y Perú. *Gayana (Concepción)*, 81(2), 100-110.
- Vidal, M. A., & Ortiz, J. C. (2004). Análisis osteológico en dos especies de *Microlophus* (Sauria, Tropiduridae) de la costa chileno-peruana. *Gayana (Concepción)*, 68(1), 9-19.
- Watkins, G. G. (1996). Proximate causes of sexual size dimorphism in the iguanian lizard *Microlophus occipitalis*. *Ecology*, 77(5), 1473-1482.
- Werner, D. I. (1978). On the biology of *Tropidurus delanonis*, Baur (Iguanidae). *Zeitschrift für Tierpsychologie*, 47(4), 337-395.
